# Supplementary material for: Diethyl Blechnic Exhibits Anti-Inflammatory and Antioxidative Activity via the TLR4/MyD88 Signaling Pathway in LPS-Stimulated RAW264.7 Cells
Source: PubMed Central journal article supplement (PMC6943418; doi:10.3390/molecules24244502), 2019-12-09
Supplement: molecules-24-04502-s001.pdf [file molecules-24-04502-s001.pdf]

# Diethyl Blechnic exhibits anti-inflammatory and antioxidative activity *via* the TLR4/MyD88 Signaling Pathway in LPS-stimulated RAW264.7 Cells

Jia He<sup>1,2</sup>, Shan Han<sup>1,2</sup>, Xin-xing Li<sup>1,2</sup>, Qin-qin Wang<sup>1,2</sup>, Yushun Cui<sup>3</sup>, Yangling Chen<sup>1,2</sup>,  
Hongwei Gao<sup>1,2\*</sup>, Liting Huang<sup>1,2\*</sup>, Shilin Yang<sup>1,2</sup>

<sup>1</sup> College of Pharmacy, Guangxi University of Chinese Medicine, Nanning 530000, China; <sup>2</sup> Guangxi Engineering Technology Research Center of Advantage Chinese Patent Drug and Ethnic Drug Development, Nanning, 530200; <sup>3</sup> State Key Laboratory of Innovative Drug and Efficient Energy-Saving Pharmaceutical Equipment, Jiangxi University of Traditional Chinese Medicine, Nanchang 330004, China.

Running Title: Diethyl Blechnic exerts anti-inflammatory and antioxidative effects.

Co-corresponding Authors:

Dr. Hongwei Gao; Email: gaohongwei06@126.com; Address: College of Pharmacy, Guangxi University of Chinese Medicine, Nanning 530000, China; Nanning 530000, China; Tel: +86-13878876311 Fax: +86-771-4953513.

Ms. Liting Huang; Email: huangliting2007happy@126.com; Address: College of Pharmacy, Guangxi University of Chinese Medicine, Nanning 530000, China; Tel: +86-15277171950 Fax: +86-771-4953513.

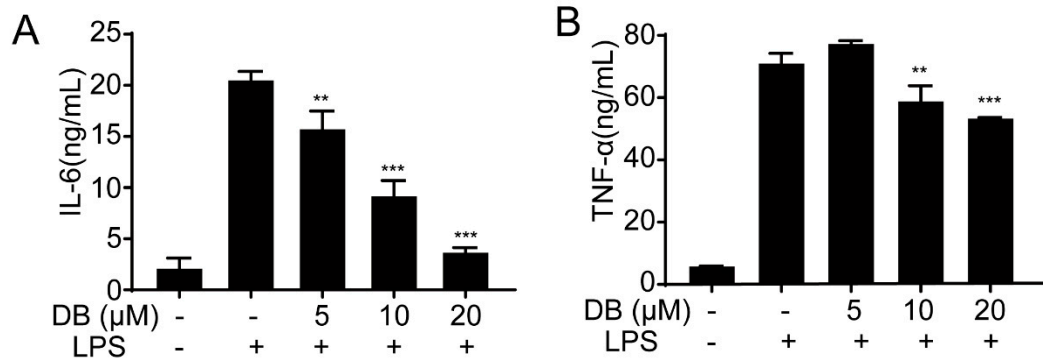

**Figure S1. DB suppressed the release of pro-inflammatory cytokines in LPS-induced RAW264.7 cells.** RAW 264.7 cells were pretreated with DB for 1 h and then stimulated with LPS (1 μg/mL) for 24 h. The levels of IL-6 (A) and TNF-α (B) in the culture medium were determined by ELISA kits. (n=3). \*\* $p < 0.01$ , and \*\*\* $p < 0.001$  vs LPS group.

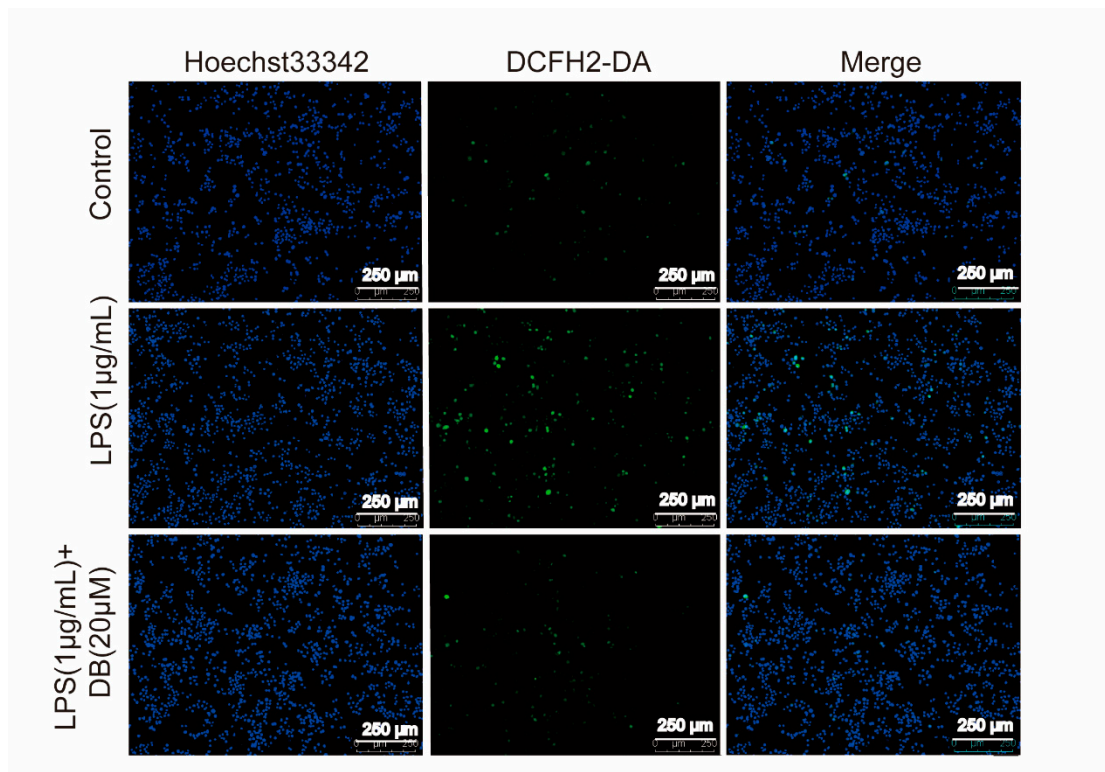

**Figure S2. DB suppressed LPS-induced ROS generation in RAW264.7 cells.** Cells pretreated with indicated concentrations of DB for 1 h were co-cultured with LPS (1 μg/mL) for another 6 h. Then cells labeled with DCFH<sub>2</sub>-DA (10 μM) for 30 min were investigated by a fluorescence microscope, (n=3). The scale bar, 250 μm.

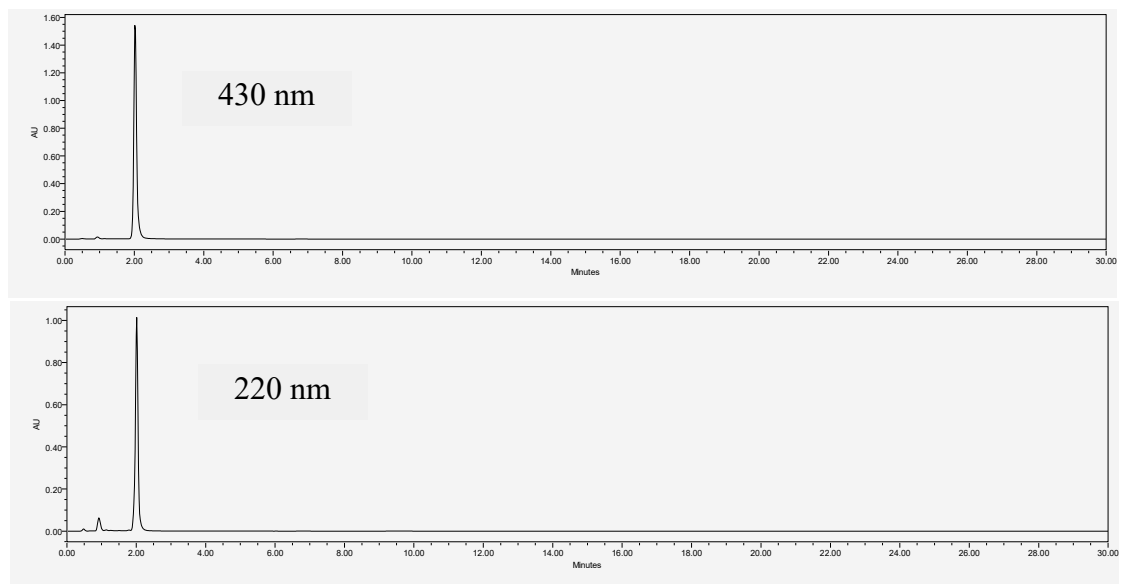

**Figure S3. The chromatographic of DB.** The HPLC conditions: the mobile flow phase: acetonitrile/water (50/50), the flow rate: 1 mL/min, the wave length: 430 and 220 nm.
